# Supplementary material for: Gender-Specific Differences in Patients With Chronic Tinnitus—Baseline Characteristics and Treatment Effects
Source: PubMed Central journal article supplement (PMC7261931; doi:10.3389/fnins.2020.00487), 2020-05-25
Supplement: Data_Sheet_1.pdf [file Data_Sheet_1.pdf]

## Supplementary Material

**Table S1. Variables overview.** A listing of all 181 variables that were used for modeling. These variables were extracted from item answers, subscale scores and total scores of 7 questionnaires: (a) General Depression Scale - long form (Allgemeine Depressionsskala; ADSL; Radloff (1977); Hautzinger and Bailer (2003)), (b) Perceived Stress Questionnaire (PSQ; Fliege et al. (2005)), (c) Short Form-8 Health Survey (SF8; Bullinger and Morfeld (2008)), (d) a sociodemographics questionnaire (SOZK; Brueggemann et al. (2016)), (e) the German version of the Tinnitus Questionnaire (TQ; Goebel and Hiller (1998)), (f) visual analogue scales measuring tinnitus loudness, frequency and impairment (TINSKAL) and (g) the Tinnitus Localization and Quality Questionnaire (TLQ; Goebel and Hiller (1992)).

| #  | Variable        | Description                                                                                                  | Response options                                |
|----|-----------------|--------------------------------------------------------------------------------------------------------------|-------------------------------------------------|
| 1  | ADSL_lie        | Lie detection score                                                                                          | -                                               |
| 2  | ADSL_depression | Depressive disorder sum score                                                                                | -                                               |
| 3  | ADSL_adsl01     | “During the past week I was bothered by things that usually don’t bother me.”                                | 0=rarely; 1=sometimes; 2=occasionally; 3=mostly |
| 4  | ADSL_adsl02     | “During the past week I did not feel like eating; my appetite was poor.”                                     | 0=rarely; 1=sometimes; 2=occasionally; 3=mostly |
| 5  | ADSL_adsl03     | “During the past week I felt that I could not shake off the blues even with help from my family or friends.” | 0=rarely; 1=sometimes; 2=occasionally; 3=mostly |
| 6  | ADSL_adsl04     | “During the past week I felt I was just as good as other people.”                                            | 0=most; 1=occasionally; 2=some; 3=rarely        |
| 7  | ADSL_adsl05     | “During the past week I had trouble keeping my mind on what I was doing.”                                    | 0=rarely; 1=sometimes; 2=occasionally; 3=mostly |
| 8  | ADSL_adsl06     | “During the past week I felt depressed.”                                                                     | 0=rarely; 1=sometimes; 2=occasionally; 3=mostly |
| 9  | ADSL_adsl07     | “During the past week I felt that everything I did was an effort.”                                           | 0=rarely; 1=sometimes; 2=occasionally; 3=mostly |
| 10 | ADSL_adsl08     | “During the past week I felt hopeful about the future.”                                                      | 0=most; 1=occasionally; 2=some; 3=rarely        |
| 11 | ADSL_adsl09     | “During the past week I thought my life had been a failure.”                                                 | 0=rarely; 1=sometimes; 2=occasionally; 3=mostly |
| 12 | ADSL_adsl10     | “During the past week I felt fearful.”                                                                       | 0=rarely; 1=sometimes; 2=occasionally; 3=mostly |
| 13 | ADSL_adsl11     | “During the past week my sleep was restless.”                                                                | 0=rarely; 1=sometimes; 2=occasionally; 3=mostly |
| 14 | ADSL_adsl12     | “During the past week I was happy.”                                                                          | 0=most; 1=occasionally; 2=some; 3=rarely        |
| 15 | ADSL_adsl13     | “During the past week I talked less than usual.”                                                             | 0=rarely; 1=sometimes; 2=occasionally; 3=mostly |
| 16 | ADSL_adsl14     | “During the past week I felt lonely.”                                                                        | 0=rarely; 1=sometimes; 2=occasionally; 3=mostly |
| 17 | ADSL_adsl15     | “During the past week people were unfriendly.”                                                               | 0=rarely; 1=sometimes; 2=occasionally; 3=mostly |
| 18 | ADSL_adsl16     | “During the past week I enjoyed life.”                                                                       | 0=most; 1=occasionally; 2=some; 3=rarely        |

Continued on next page

| #  | Variable       | Description                                             | Response options                                   |
|----|----------------|---------------------------------------------------------|----------------------------------------------------|
| 19 | ADSL_ads117    | “During the past week I had crying spells.”             | 0=rarely; 1=sometimes;<br>2=occasionally; 3=mostly |
| 20 | ADSL_ads118    | “During the past week I felt sad.”                      | 0=rarely; 1=sometimes;<br>2=occasionally; 3=mostly |
| 21 | ADSL_ads119    | “During the past week I felt that people disliked me.”  | 0=rarely; 1=sometimes;<br>2=occasionally; 3=mostly |
| 22 | ADSL_ads120    | “During the past week I could not get going.”           | 0=rarely; 1=sometimes;<br>2=occasionally; 3=mostly |
| 23 | ADSL_timestamp | ADSL: avg. time needed to fill an item (in secs)        | -                                                  |
| 24 | PSQ_demand     | Demand score                                            | -                                                  |
| 25 | PSQ_tension    | Tension score                                           | -                                                  |
| 26 | PSQ_joy        | Joy score                                               | -                                                  |
| 27 | PSQ_stress     | Stress sum score                                        | -                                                  |
| 28 | PSQ_worries    | Worries score                                           | -                                                  |
| 29 | PSQ_stress01   | “You feel rested.”                                      | 1=hardly ever; 2=rarely;<br>3=frequently; 4=mostly |
| 30 | PSQ_stress02   | “You feel that too many demands are being made on you.” | 1=hardly ever; 2=rarely;<br>3=frequently; 4=mostly |
| 31 | PSQ_stress03   | “You are irritable or grouchy.”                         | 1=hardly ever; 2=rarely;<br>3=frequently; 4=mostly |
| 32 | PSQ_stress04   | “You have too many things to do.”                       | 1=hardly ever; 2=rarely;<br>3=frequently; 4=mostly |
| 33 | PSQ_stress05   | “You feel lonely or isolated.”                          | 1=hardly ever; 2=rarely;<br>3=frequently; 4=mostly |
| 34 | PSQ_stress06   | “You find yourself in situations of conflict.”          | 1=hardly ever; 2=rarely;<br>3=frequently; 4=mostly |
| 35 | PSQ_stress07   | “You feel you’re doing things you really like.”         | 1=hardly ever; 2=rarely;<br>3=frequently; 4=mostly |
| 36 | PSQ_stress08   | “You feel tired.”                                       | 1=hardly ever; 2=rarely;<br>3=frequently; 4=mostly |
| 37 | PSQ_stress09   | “You fear you may not manage to attain your goals.”     | 1=hardly ever; 2=rarely;<br>3=frequently; 4=mostly |
| 38 | PSQ_stress10   | “You feel calm.”                                        | 1=hardly ever; 2=rarely;<br>3=frequently; 4=mostly |
| 39 | PSQ_stress11   | “You have too many decisions to make.”                  | 1=hardly ever; 2=rarely;<br>3=frequently; 4=mostly |
| 40 | PSQ_stress12   | “You feel frustrated.”                                  | 1=hardly ever; 2=rarely;<br>3=frequently; 4=mostly |
| 41 | PSQ_stress13   | “You are full of energy.”                               | 1=hardly ever; 2=rarely;<br>3=frequently; 4=mostly |
| 42 | PSQ_stress14   | “You feel tense.”                                       | 1=hardly ever; 2=rarely;<br>3=frequently; 4=mostly |

Continued on next page

| #  | Variable           | Description                                                                 | Response options                                |
|----|--------------------|-----------------------------------------------------------------------------|-------------------------------------------------|
| 43 | PSQ_stress15       | “Your problems seem to be piling up.”                                       | 1=hardly ever; 2=rarely; 3=frequently; 4=mostly |
| 44 | PSQ_stress16       | “You feel you’re in a hurry.”                                               | 1=hardly ever; 2=rarely; 3=frequently; 4=mostly |
| 45 | PSQ_stress17       | “You feel safe and protected.”                                              | 1=hardly ever; 2=rarely; 3=frequently; 4=mostly |
| 46 | PSQ_stress18       | “You have many worries.”                                                    | 1=hardly ever; 2=rarely; 3=frequently; 4=mostly |
| 47 | PSQ_stress19       | “You are under pressure from other people.”                                 | 1=hardly ever; 2=rarely; 3=frequently; 4=mostly |
| 48 | PSQ_stress20       | “You feel discouraged.”                                                     | 1=hardly ever; 2=rarely; 3=frequently; 4=mostly |
| 49 | PSQ_stress21       | “You enjoy yourself.”                                                       | 1=hardly ever; 2=rarely; 3=frequently; 4=mostly |
| 50 | PSQ_stress22       | “You are afraid for the future.”                                            | 1=hardly ever; 2=rarely; 3=frequently; 4=mostly |
| 51 | PSQ_stress23       | “You feel you’re doing things because you have to not because you want to.” | 1=hardly ever; 2=rarely; 3=frequently; 4=mostly |
| 52 | PSQ_stress24       | “You feel criticised or judged.”                                            | 1=hardly ever; 2=rarely; 3=frequently; 4=mostly |
| 53 | PSQ_stress25       | “You are lighthearted.”                                                     | 1=hardly ever; 2=rarely; 3=frequently; 4=mostly |
| 54 | PSQ_stress26       | “You feel mentally exhausted.”                                              | 1=hardly ever; 2=rarely; 3=frequently; 4=mostly |
| 55 | PSQ_stress27       | “You have trouble relaxing.”                                                | 1=hardly ever; 2=rarely; 3=frequently; 4=mostly |
| 56 | PSQ_stress28       | “You feel loaded down with responsibility.”                                 | 1=hardly ever; 2=rarely; 3=frequently; 4=mostly |
| 57 | PSQ_stress29       | “You have enough time for yourself.”                                        | 1=hardly ever; 2=rarely; 3=frequently; 4=mostly |
| 58 | PSQ_stress30       | “You feel under pressure from deadlines.”                                   | 1=hardly ever; 2=rarely; 3=frequently; 4=mostly |
| 59 | PSQ_timestamp      | PSQ: avg. time needed to fill an item (in secs)                             | -                                               |
| 60 | SF8_bodily_health  | Bodily pain score                                                           | -                                               |
| 61 | SF8_genhealth      | General health score                                                        | -                                               |
| 62 | SF8_mental         | Mental health summary score                                                 | -                                               |
| 63 | SF8_mentalhealth   | Mental health score                                                         | -                                               |
| 64 | SF8_physicalhealth | Physical health summary score                                               | -                                               |
| 65 | SF8_physicalfunc   | Physical functioning score                                                  | -                                               |
| 66 | SF8_emotional      | Role emotional score                                                        | -                                               |
| 67 | SF8_physical       | Role physical score                                                         | -                                               |
| 68 | SF8_social         | Social functioning score                                                    | -                                               |

Continued on next page

| #  | Variable         | Description                                                                                                                                          | Response options                                                                           |
|----|------------------|------------------------------------------------------------------------------------------------------------------------------------------------------|--------------------------------------------------------------------------------------------|
| 69 | SF8_sf01         | “Overall, how would you rate your health during the past week?”                                                                                      | 1=excellent; 2=very good; 3=good; 4=fair; 5=poor; 6=very poor                              |
| 70 | SF8_sf02         | “During the past 4 weeks, how much did physical health problems limit your physical activities (such as walking or climbing stairs)?”                | 1=not at all; 2=very little; 3=somewhat; 4=quite a lot; 5=could not do physical activities |
| 71 | SF8_sf03         | “During the past 4 weeks, how much difficulty did you have doing your daily work, both at home and away from home, because of your physical health?” | 1=none at all; 2=a little bit; 3=some; 4=quite a lot; 5=could not do daily work            |
| 72 | SF8_sf04         | “How much bodily pain have you had during the past 4 weeks?”                                                                                         | 1=none; 2=very mild; 3=mild; 4=moderate; 5=severe; 6=very severe                           |
| 73 | SF8_sf05         | “During the past 4 weeks, how much energy did you have?”                                                                                             | 1=very much; 2=quite a lot; 3=some; 4=a little; 5=none                                     |
| 74 | SF8_sf06         | “During the past 4 weeks, how much did your physical health or emotional problems limit your usual social activities with family or friends?”        | 1=not at all; 2=very little; 3=somewhat; 4=quite a lot; 5=could not do social activities   |
| 75 | SF8_sf07         | “During the past 4 weeks, how much have you been bothered by emotional problems (...) ?”                                                             | 1=not at all; 2=slightly; 3=moderately ately; 4=quite a lot; 5=extremely                   |
| 76 | SF8_sf08         | “During the past 4 weeks, how much did personal or emotional problems keep you from doing your usual work, school or other daily activities?”        | 1=not at all; 2=very little; 3=somewhat; 4=quite a lot; 5=could not do daily activities    |
| 77 | SF8_timestamp    | SF8: avg. time needed to fill an item (in secs)                                                                                                      | -                                                                                          |
| 78 | SF8_vitality     | Vitality score                                                                                                                                       | -                                                                                          |
| 79 | SOZK_gender      | Male gender                                                                                                                                          | -                                                                                          |
| 80 | SOZK_nationality | German nationality                                                                                                                                   | -                                                                                          |
| 81 | SOZK_partnership | In partnership                                                                                                                                       | -                                                                                          |
| 82 | SOZK_divorced    | Divorced                                                                                                                                             | -                                                                                          |
| 83 | SOZK_married     | Married                                                                                                                                              | -                                                                                          |
| 84 | SOZK_unmarried   | Unmarried                                                                                                                                            | -                                                                                          |
| 85 | SOZK_abitur      | Education level: “Abitur”                                                                                                                            | -                                                                                          |
| 86 | SOZK_fachabitur  | Education level: “Fachabitur”                                                                                                                        | -                                                                                          |
| 87 | SOZK_lowersec    | Education level: lower secondary school                                                                                                              | -                                                                                          |
| 88 | SOZK_mittlereife | Education level: “mittlere Reife”                                                                                                                    | -                                                                                          |
| 89 | SOZK_geselle     | Education level: “Geselle”                                                                                                                           | -                                                                                          |
| 90 | SOZK_graduate    | Education level: university                                                                                                                          | -                                                                                          |
| 91 | SOZK_nograd      | Education level: none                                                                                                                                | -                                                                                          |

Continued on next page

| #   | Variable           | Description                                                                | Response options                  |
|-----|--------------------|----------------------------------------------------------------------------|-----------------------------------|
| 92  | SOZK_meister       | Education level: "Meister"                                                 | -                                 |
| 93  | SOZK_pupil         | Education level: currently pupil or "Azubi"                                | -                                 |
| 94  | SOZK_student       | Education level: currently student                                         | -                                 |
| 95  | SOZK_job           | Job status: currently employed                                             | -                                 |
| 96  | SOZK_unemp         | Duration of unemployment in the last 5 years                               | -                                 |
| 97  | SOZK_employee      | Occupation: employee                                                       | -                                 |
| 98  | SOZK_worker        | Occupation: worker                                                         | -                                 |
| 99  | SOZK_civservant    | Occupation: civil servant                                                  | -                                 |
| 100 | SOZK_occupother    | Occupation: other                                                          | -                                 |
| 101 | SOZK_selfempl      | Occupation: self-employed                                                  | -                                 |
| 102 | SOZK_ill           | "How long have you been ill during the last 12 months? (in months)"        | -                                 |
| 103 | SOZK_tinnitusdur   | "How long have you been suffering from tinnitus (in years)?"               | -                                 |
| 104 | SOZK_psychotreat   | "How long have you been in psychotherapeutic treatment? (in months)"       | -                                 |
| 105 | SOZK_nophysicians  | "How many physicians have you visited because of your current complaints?" | -                                 |
| 106 | SOZK_timestamp     | SOZK: avg. time needed to fill an item (in secs)                           | -                                 |
| 107 | TINSKAL_impairment | Degree of tinnitus impairment                                              | -                                 |
| 108 | TINSKAL_frequency  | Tinnitus frequency                                                         | -                                 |
| 109 | TINSKAL_loudness   | Tinnitus loudness                                                          | -                                 |
| 110 | TINSKAL_timestamp  | TINSKAL: avg. time needed to fill an item (in secs)                        | -                                 |
| 111 | TLQ_timestamp      | TLQ: avg. time needed to fill an item (in secs)                            | -                                 |
| 112 | TLQ_righear        | The tinnitus is located in the right ear.                                  | -                                 |
| 113 | TLQ_leftear        | The tinnitus is located in the left ear.                                   | -                                 |
| 114 | TLQ_bothears       | The tinnitus is located in both ears.                                      | -                                 |
| 115 | TLQ_entirehead     | The tinnitus is located in the entire head.                                | -                                 |
| 116 | TLQ_whistling      | Tinnitus noise: whistling                                                  | -                                 |
| 117 | TLQ_hissing        | Tinnitus noise: hissing                                                    | -                                 |
| 118 | TLQ_ringing        | Tinnitus noise: ringing                                                    | -                                 |
| 119 | TLQ_rustling       | Tinnitus noise: rustling                                                   | -                                 |
| 120 | TQ_audpercdiff     | Auditory perceptual difficulties score                                     | -                                 |
| 121 | TQ_cogdistress     | Cognitive distress score                                                   | -                                 |
| 122 | TQ_emodistress     | Emotional distress score                                                   | -                                 |
| 123 | TQ_intrusivness    | Intrusiveness score                                                        | -                                 |
| 124 | TQ_psychodistress  | Psychological distress score                                               | -                                 |
| 125 | TQ_sleepdisturb    | Sleep disturbances score                                                   | -                                 |
| 126 | TQ_somaticcompl    | Somatic complaints score                                                   | -                                 |
| 127 | TQ_distress        | Total tinnitus distress score                                              | -                                 |
| 128 | TQ_timestamp       | TQ: avg. time needed to fill an item (in secs)                             | -                                 |
| 129 | TQ_tin01           | "I can sometimes ignore the noises even when they are there."              | 0=not true; 1=partly true; 2=true |

Continued on next page

| # Variable   | Description                                                                           | Response options                  |
|--------------|---------------------------------------------------------------------------------------|-----------------------------------|
| 130 TQ_tin02 | “I am unable to enjoy listening to music because of the noises.”                      | 0=not true; 1=partly true; 2=true |
| 131 TQ_tin03 | “It’s unfair that I have to suffer with my noises.”                                   | 0=not true; 1=partly true; 2=true |
| 132 TQ_tin04 | “I wake up more in the night because of my noises.”                                   | 0=not true; 1=partly true; 2=true |
| 133 TQ_tin05 | “I am aware of the noises from the moment I get up to the moment I sleep.”            | 0=not true; 1=partly true; 2=true |
| 134 TQ_tin06 | “Your attitude to the noise makes no difference to how it affects you.”               | 0=not true; 1=partly true; 2=true |
| 135 TQ_tin07 | “Most of the time the noises are fairly quiet.”                                       | 0=not true; 1=partly true; 2=true |
| 136 TQ_tin08 | “I worry that the noises will give me a nervous breakdown.”                           | 0=not true; 1=partly true; 2=true |
| 137 TQ_tin09 | “Because of the noises I have difficulty in telling where sounds are coming from.”    | 0=not true; 1=partly true; 2=true |
| 138 TQ_tin10 | “The way the noises sound is really unpleasant.”                                      | 0=not true; 1=partly true; 2=true |
| 139 TQ_tin11 | “I feel I can never get away from the noises.”                                        | 0=not true; 1=partly true; 2=true |
| 140 TQ_tin12 | “Because of the noises I wake up earlier in the morning.”                             | 0=not true; 1=partly true; 2=true |
| 141 TQ_tin13 | “I worry whether I will be able to put up with this problem for ever.”                | 0=not true; 1=partly true; 2=true |
| 142 TQ_tin14 | “Because of the noises it is more difficult to listen to several people at once.”     | 0=not true; 1=partly true; 2=true |
| 143 TQ_tin15 | ”The noises are loud most of the time.                                                | 0=not true; 1=partly true; 2=true |
| 144 TQ_tin16 | “Because of the noises I worry that there is something seriously wrong with my body.” | 0=not true; 1=partly true; 2=true |
| 145 TQ_tin17 | “If the noises continue my life will not be worth living.”                            | 0=not true; 1=partly true; 2=true |
| 146 TQ_tin18 | “I have lost some of my confidence because of the noises.”                            | 0=not true; 1=partly true; 2=true |
| 147 TQ_tin19 | “I wish someone understood what this problem is like.”                                | 0=not true; 1=partly true; 2=true |
| 148 TQ_tin20 | “The noises distract me whatever I am doing.”                                         | 0=not true; 1=partly true; 2=true |
| 149 TQ_tin21 | “There is very little one can do to cope with the noises.”                            | 0=not true; 1=partly true; 2=true |
| 150 TQ_tin22 | “The noises sometimes give me a pain in the ear or head.”                             | 0=not true; 1=partly true; 2=true |

Continued on next page

| #   | Variable | Description                                                                            | Response options                  |
|-----|----------|----------------------------------------------------------------------------------------|-----------------------------------|
| 151 | TQ_tin23 | “When I feel low and pessimistic the noise seems worse.”                               | 0=not true; 1=partly true; 2=true |
| 152 | TQ_tin24 | “I am more irritable with my family and friends because of the noises.”                | 0=not true; 1=partly true; 2=true |
| 153 | TQ_tin25 | “Because of the noises I have tension in the muscles of my head and neck.”             | 0=not true; 1=partly true; 2=true |
| 154 | TQ_tin26 | “Because of the noises other people’s voices sound distorted to me.”                   | 0=not true; 1=partly true; 2=true |
| 155 | TQ_tin27 | “It will be dreadful if these noises never go away.”                                   | 0=not true; 1=partly true; 2=true |
| 156 | TQ_tin28 | “I worry that the noises might damage my physical health.”                             | 0=not true; 1=partly true; 2=true |
| 157 | TQ_tin29 | “The noise seems to go right through my head.”                                         | 0=not true; 1=partly true; 2=true |
| 158 | TQ_tin30 | “Almost all my problems are caused by these noises.”                                   | 0=not true; 1=partly true; 2=true |
| 159 | TQ_tin31 | “Sleep is my main problem.”                                                            | 0=not true; 1=partly true; 2=true |
| 160 | TQ_tin32 | “It’s the way you think about the noise - NOT the noise itself which makes you upset.” | 0=not true; 1=partly true; 2=true |
| 161 | TQ_tin33 | “I have more difficulty following a conversation because of the noises.”               | 0=not true; 1=partly true; 2=true |
| 162 | TQ_tin34 | “I find it harder to relax because of the noises.”                                     | 0=not true; 1=partly true; 2=true |
| 163 | TQ_tin35 | “My noises are often so bad that I cannot ignore them.”                                | 0=not true; 1=partly true; 2=true |
| 164 | TQ_tin36 | “It takes me longer to get to sleep because of the noises.”                            | 0=not true; 1=partly true; 2=true |
| 165 | TQ_tin37 | “I sometimes get very angry when I think about having the noises.”                     | 0=not true; 1=partly true; 2=true |
| 166 | TQ_tin38 | “I find it harder to use the telephone because of the noises.”                         | 0=not true; 1=partly true; 2=true |
| 167 | TQ_tin39 | “I am more liable to feel low because of the noises.”                                  | 0=not true; 1=partly true; 2=true |
| 168 | TQ_tin40 | “I am able to forget about the noises when I am doing something interesting.”          | 0=not true; 1=partly true; 2=true |
| 169 | TQ_tin41 | “Because of the noises life seems to be getting on top of me.”                         | 0=not true; 1=partly true; 2=true |
| 170 | TQ_tin42 | “I have always been sensitive about trouble with my ears.”                             | 0=not true; 1=partly true; 2=true |
| 171 | TQ_tin43 | “I often think about whether the noises will ever go away.”                            | 0=not true; 1=partly true; 2=true |

Continued on next page

| # Variable   | Description                                                           | Response options                     |
|--------------|-----------------------------------------------------------------------|--------------------------------------|
| 172 TQ_tin44 | “I can imagine coping with the noises.”                               | 0=not true; 1=partly true;<br>2=true |
| 173 TQ_tin45 | “The noises never ‘let up’.”                                          | 0=not true; 1=partly true;<br>2=true |
| 174 TQ_tin46 | “A stronger person might be better at accepting this problem.”        | 0=not true; 1=partly true;<br>2=true |
| 175 TQ_tin47 | “I am a victim of my noises.”                                         | 0=not true; 1=partly true;<br>2=true |
| 176 TQ_tin48 | “The noises have affected my concentration.”                          | 0=not true; 1=partly true;<br>2=true |
| 177 TQ_tin49 | “The noises are one of those problems in life you have to live with.” | 0=not true; 1=partly true;<br>2=true |
| 178 TQ_tin50 | “Because of the noises I am unable to enjoy the radio or television.” | 0=not true; 1=partly true;<br>2=true |
| 179 TQ_tin51 | “The noises sometimes produce a bad headache.”                        | 0=not true; 1=partly true;<br>2=true |
| 180 TQ_tin52 | “I have always been a light sleeper.”                                 | 0=not true; 1=partly true;<br>2=true |
| 181 age      | patient age                                                           | -                                    |



**Table S2. Hyperparameter tuning grid.** The table provides an overview about each algorithm, including the associated R package, tuned hyperparameters and corresponding candidate value ranges. If necessary, any other hyperparameter were set to its default value. Hyperparameter selection was conducted for five algorithms: LASSO (Friedman et al., 2010), RIDGE (Hoerl and Kennard, 1970), support vector machine (SVM; Boser et al. (1992)), random forest (RF; Breiman (2001)) and gradient boosted trees (GBT; Friedman (2001)). All classification and regression models were built with the statistical programming language R (R Core Team, 2019) using the package `mlr` (Bischl et al., 2016), which provides a consistent interface to many machine learning algorithms from other R packages. A grid search was employed for hyperparameter tuning using accuracy (RMSE) as evaluation measure for classification (regression) algorithms.

| Algorithm (R package)                                           | Hyperparameter                                 | Min               | Max       | #Values |
|-----------------------------------------------------------------|------------------------------------------------|-------------------|-----------|---------|
| LASSO, RIDGE (both <code>glmnet</code> (Friedman et al., 2010)) | <code>lambda</code>                            | 0.01              | $10^{10}$ | 100     |
|                                                                 | SVM ( <code>e1071</code> (Meyer et al., 2019)) | <code>cost</code> | 0.01      | 3       |
| RF ( <code>ranger</code> (Wright and Ziegler, 2017))            | <code>gamma</code>                             | 0                 | 3         | 4       |
|                                                                 | <code>kernel</code>                            | *                 | -         | 4       |
|                                                                 | <code>mtry</code>                              | 4                 | 100       | 7       |
|                                                                 | <code>min.node.size</code>                     | 1                 | 25        | 6       |
| GBT ( <code>xgboost</code> (Chen et al., 2019))                 | <code>eta</code>                               | 0.01              | 0.4       | 4       |
|                                                                 | <code>max_depth</code>                         | 1                 | 3         | 3       |
|                                                                 | <code>colsample_bytree</code>                  | 0.2               | 1         | 5       |
|                                                                 | <code>min_child_weight</code>                  | 0.5               | 2         | 3       |
|                                                                 | <code>subsample</code>                         | 0.2               | 1         | 3       |
|                                                                 | <code>nrounds</code>                           | 50                | 250       | 3       |

## REFERENCES

- Bischl, B., Lang, M., Kotthoff, L., Schiffner, J., Richter, J., Studerus, E., et al. (2016). mlr: Machine learning in r. *Journal of Machine Learning Research* 17, 1–5
- Boser, B. E., Guyon, I. M., and Vapnik, V. N. (1992). A training algorithm for optimal margin classifiers. In *Proc. of Workshop on Computational Learning Theory* (ACM), 144–152
- Breiman, L. (2001). Random forests. *Machine learning* 45, 5–32
- Brueggemann, P., Szczepek, A. J., Rose, M., McKenna, L., Olze, H., and Mazurek, B. (2016). Impact of multiple factors on the degree of tinnitus distress. *Frontiers in human neuroscience* 10, 341
- Bullinger, M. and Morfeld, M. (2008). Der SF-36 Health Survey. In *Gesundheitsökonomische Evaluationen* (Springer). 387–402
- Chen, T., He, T., Benesty, M., Khotilovich, V., Tang, Y., Cho, H., et al. (2019). *xgboost: Extreme Gradient Boosting*. R package version 0.90.0.2
- Fliege, H., Rose, M., Arck, P., Walter, O. B., Kocalevent, R.-D., Weber, C., et al. (2005). The Perceived Stress Questionnaire (PSQ) reconsidered: validation and reference values from different clinical and healthy adult samples. *Psychosomatic medicine* 67, 78–88
- Friedman, J., Hastie, T., and Tibshirani, R. (2010). Regularization paths for generalized linear models via coordinate descent. *Journal of Statistical Software* 33, 1–22
- Friedman, J. H. (2001). Greedy function approximation: a gradient boosting machine. *Annals of Statistics* , 1189–1232
- Goebel, G. and Hiller, W. (1992). Psychische Beschwerden bei chronischem Tinnitus: Erprobung und Evaluation des Tinnitus-Fragebogens (TF). *Verhaltenstherapie* 2, 13–22
- Goebel, G. and Hiller, W. (1998). *Tinnitus-Fragebogen:(TF); ein Instrument zur Erfassung von Belastung und Schweregrad bei Tinnitus; Handanweisung* (hogrefe, Verlag für Psychologie)
- Hautzinger, M. and Bailer, M. (2003). ADS-Allgemeine Depressionsskala. In *Diagnostische Verfahren in der Psychotherapie* (Beltz)
- Hoerl, A. E. and Kennard, R. W. (1970). Ridge regression: Biased estimation for nonorthogonal problems. *Technometrics* 12, 55–67
- Meyer, D., Dimitriadou, E., Hornik, K., Weingessel, A., and Leisch, F. (2019). *e1071: Misc Functions of the Department of Statistics, Probability Theory Group (Formerly: E1071), TU Wien*. R package version 1.7-3
- R Core Team (2019). *R: A Language and Environment for Statistical Computing*. R Foundation for Statistical Computing, Vienna, Austria
- Radloff, L. S. (1977). The CES-D scale: a self-report depression scale for research in the general population. *Applied psychological measurement* 1, 385–401
- Wright, M. N. and Ziegler, A. (2017). ranger: A fast implementation of random forests for high dimensional data in C++ and R. *Journal of Statistical Software* 77, 1–17. doi:10.18637/jss.v077.i01
